# Supplementary material for: The Fat Body Transcriptomes of the Yellow Fever Mosquito Aedes aegypti, Pre- and Post- Blood Meal
Source: PLoS One. 2011 Jul 27;6(7):e22573. doi: 10.1371/journal.pone.0022573 (PMC3144915; doi:10.1371/journal.pone.0022573)
Supplement: Table S4 — Transcripts reads aligned with using blat, fold change in expression between blood fed and not-blood fed state. (XLS) [file pone.0022573.s007.xls]

## Sheet: Sheet1
Transcript ID	Fold upregulation, PBM	R value (> 9 is significant)	Ensembl Transcript ID,Description
AAEL007599-RA	2507	759.917	cathepsin b [Source:VB External Description;Acc:AAEL007599]
AAEL014561-RA	699	212.865	"clip-domain serine protease, putative [Source:VB External Description;Acc:AAEL014005]"
AAEL007585-RA	686.667	1236.81	cathepsin b [Source:VB External Description;Acc:AAEL007585]
AAEL007590-RA	645.333	580.726	cathepsin b [Source:VB External Description;Acc:AAEL007590]
AAEL012216-RA	553	1158.67	40S ribosomal protein S15 [Source:VB External Description;Acc:AAEL011656]
AAEL015312-RA	536.143	1122.83	60S ribosomal protein L23 (L17A)(AeRpL17A) [Source:VB External Description;Acc:AAEL015006]
AAEL006126-RA	535.25	640.532	conserved hypothetical protein [Source:VB External Description;Acc:AAEL006126]
AAEL006563-RA	430.25	513.009	Vitellogenic carboxypeptidase Precursor (EC 3.4.16.-) [Source:VB External Description;Acc:AAEL006563]
AAEL013027-RA	403	122.725	60S ribosomal protein L11 [Source:VB External Description;Acc:AAEL012944]
AAEL006670-RA	371	112.98	conserved hypothetical protein [Source:VB External Description;Acc:AAEL006670]
AAEL006126-RB	322.667	573.69	conserved hypothetical protein [Source:VB External Description;Acc:AAEL006126]
AAEL006542-RA	268.667	237.75	retinoid-inducible serine carboxypeptidase (serine carboxypeptidase [Source:VB External Description;Acc:AAEL006542]
AAEL010434-RA	245.692	939.799	40S ribosomal protein S12 [Source:VB External Description;Acc:AAEL010299]
AAEL006138-RA	236.143	971.619	hypothetical protein [Source:VB External Description;Acc:AAEL006138]
AAEL010097-RA	146	44.4611	60S ribosomal protein L4 [Source:VB External Description;Acc:AAEL009994]
AAEL013338-RA	131	39.8932	60S ribosomal protein L10a [Source:VB External Description;Acc:AAEL013221]
AAEL003989-RA	126.583	435.689	"GTP-binding protein alpha subunit, gna [Source:VB External Description;Acc:AAEL003989]"
AAEL017403-RA	99	28.0137
AAEL007097-RA	91	27.7121	4-nitrophenylphosphatase [Source:VB External Description;Acc:AAEL007097]
AAEL000923-RA	55	16.7491	conserved hypothetical protein [Source:VB External Description;Acc:AAEL000923]
AAEL015289-RA	54	16.4445	40S ribosomal protein S24 [Source:VB External Description;Acc:AAEL014903]
AAEL004912-RA	51	15.5309	hypothetical protein [Source:VB External Description;Acc:AAEL004912]
AAEL004978-RA	38	9.84989	DEAD box ATP-dependent RNA helicase [Source:VB External Description;Acc:AAEL004978]
AAEL004904-RA	37	11.2675	hypothetical protein [Source:VB External Description;Acc:AAEL004904]
AAEL010692-RA	36	10.963	phosphoribosylamine-glycine ligase [Source:VB External Description;Acc:AAEL010640]
AAEL017098-RA	34.6667	53.2448	"trypsin, putative [Source:VB External Description;Acc:AAEL015432]"
AAEL013348-RA	34	10.354	60S ribosomal protein L37a [Source:VB External Description;Acc:AAEL013272]
AAEL004390-RA	33	10.0494	heme peroxidase [Source:VB External Description;Acc:AAEL004390]
AAEL017269-RA	32	9.74491
AAEL012928-RA	31	9.44038	ribosomal protein L15 [Source:VB External Description;Acc:AAEL012736]
AAEL004386-RA	30	9.13585	chorion peroxidase precursor [Source:VB External Description;Acc:AAEL004386]
AAEL009636-RB	19	17.4373	conserved hypothetical protein [Source:VB External Description;Acc:AAEL009636]
AAEL008485-RA	18.3333	12.5142	conserved hypothetical protein [Source:VB External Description;Acc:AAEL008485]
AAEL008006-RA	17	15.1891	3-hydroxyacyl-coa dehyrogenase [Source:VB External Description;Acc:AAEL008006]
AAEL009291-RA	15.7143	24.0722	retinoid-inducible serine carboxypeptidase (serine carboxypeptidase [Source:VB External Description;Acc:AAEL009291]
AAEL002381-RA	15	16.2047	conserved hypothetical protein [Source:VB External Description;Acc:AAEL002381]
AAEL011414-RA	14	17.7923	"ADP,ATP carrier protein [Source:VB External Description;Acc:AAEL010884]"
AAEL011414-RB	14	17.7923	conserved hypothetical protein [Source:VB External Description;Acc:AAEL011219]
AAEL011414-RC	12.2857	17.486	"high mobility group non-histone protein, putative [Source:VB External Description;Acc:AAEL011414]"
AAEL011414-RD	11.8571	16.6761	"high mobility group non-histone protein, putative [Source:VB External Description;Acc:AAEL011414]"
AAEL008473-RA	10.7059	35.2615	"cysteine-rich venom protein, putative [Source:VB External Description;Acc:AAEL008473]"
AAEL012251-RA	10.6667	12.3827	rap55 [Source:VB External Description;Acc:AAEL011870]
AAEL005997-RA	10.3077	25.5927	"allergen, putative [Source:VB External Description;Acc:AAEL005997]"
AAEL011870-RA	10.1429	13.4761	"ribosomal protein L27, putative [Source:VB External Description;Acc:AAEL011587]"
AAEL006586-RA	9.8125	29.4121	serine protease [Source:VB External Description;Acc:AAEL006586]
AAEL005772-RA	8.85714	33.3812	"odorant-binding protein 99c, putative [Source:VB External Description;Acc:AAEL005772]"
AAEL015432-RA	8.75	24.9913	hypothetical protein [Source:VB External Description;Acc:AAEL015289]
AAEL000109-RA	8.14286	9.84607	"Enolase-phosphatase E1 (EC 3.1.3.77)(2,3-diketo-5-methylthio-1-phosphopentane phosphatase) [Source:VB External Description;Acc:AAEL000109]"
AAEL000105-RA	7.61538	16.5533	"beta-alanine synthase, putative [Source:VB External Description;Acc:AAEL000105]"
AAEL001414-RB	6.6	20.4451	conserved hypothetical protein [Source:VB External Description;Acc:AAEL001414]
AAEL001414-RA	6.5	19.9594	conserved hypothetical protein [Source:VB External Description;Acc:AAEL001414]
AAEL001401-RA	5.92308	11.1762	conserved hypothetical protein [Source:VB External Description;Acc:AAEL001401]
AAEL001209-RA	5.5	9.12628	sodium-dependent phosphate transporter [Source:VB External Description;Acc:AAEL001209]
AAEL006576-RA	5.48387	23.4603	"clip-domain serine protease, putative [Source:VB External Description;Acc:AAEL006576]"
AAEL006576-RB	5.48387	23.4603	"clip-domain serine protease, putative [Source:VB External Description;Acc:AAEL006576]"
AAEL014005-RA	5.25926	19.036	conserved hypothetical protein [Source:VB External Description;Acc:AAEL013680]
AAEL009637-RA	5.24658	51.2559	conserved hypothetical protein [Source:VB External Description;Acc:AAEL009636]
AAEL017451-RA	5.21429	9.72659
AAEL001402-RA	5.14286	9.49874	conserved hypothetical protein [Source:VB External Description;Acc:AAEL001402]
AAEL005763-RA	4.8125	9.66643	lysosomal alpha-mannosidase (mannosidase alpha class 2b member 1) [Source:VB External Description;Acc:AAEL005763]
AAEL009955-RA	3.92308	16.1131	nucleolar GTP-binding protein [Source:VB External Description;Acc:AAEL009859]
AAEL001863-RA	3.75	28.7176	zinc carboxypeptidase [Source:VB External Description;Acc:AAEL001863]
AAEL006834-RA	2.82667	15.2777	glutamate semialdehyde dehydrogenase [Source:VB External Description;Acc:AAEL006834]
AAEL003877-RB	0.621479	10.2636	ubiquitin [Source:VB External Description;Acc:AAEL003877]
AAEL003877-RA	0.557789	20.79	ubiquitin [Source:VB External Description;Acc:AAEL003877]
AAEL004325-RA	0.514388	9.10387	60S ribosomal protein L5 [Source:VB External Description;Acc:AAEL004325]
AAEL005901-RA	0.477124	18.0271	40S ribosomal protein S3a [Source:VB External Description;Acc:AAEL005901]
AAEL013158-RA	0.475575	27.5366	receptor for activated protein kinase c (rack1) [Source:VB External Description;Acc:AAEL013069]
AAEL005901-RB	0.474138	27.7243	40S ribosomal protein S3a [Source:VB External Description;Acc:AAEL005901]
AAEL000987-RA	0.471154	16.8055	60S ribosomal protein L8 [Source:VB External Description;Acc:AAEL000987]
AAEL006141-RA	0.469298	18.5826	conserved hypothetical protein [Source:VB External Description;Acc:AAEL006141]
AAEL005766-RA	0.465054	15.4634	fructose-bisphosphate aldolase [Source:VB External Description;Acc:AAEL005766]
AAEL004149-RA	0.458525	37.1915	hypothetical protein [Source:VB External Description;Acc:AAEL004149]
AAEL004500-RA	0.45283	20.9812	eukaryotic translation elongation factor [Source:VB External Description;Acc:AAEL004500]
AAEL004500-RB	0.451883	21.1167	eukaryotic translation elongation factor [Source:VB External Description;Acc:AAEL004500]
AAEL016995-RA	0.440191	19.4742	cathepsin b [Source:VB External Description;Acc:AAEL015312]
AAEL008103-RB	0.431727	24.0999	40S ribosomal protein S8 [Source:VB External Description;Acc:AAEL008103]
AAEL009341-RA	0.428506	107.465	"ribosomal protein L34, putative [Source:VB External Description;Acc:AAEL009341]"
AAEL012736-RD	0.425974	19.1147	ribosomal protein L15 [Source:VB External Description;Acc:AAEL012736]
AAEL006698-RA	0.425	27.9234	60S ribosomal protein L31 [Source:VB External Description;Acc:AAEL006698]
AAEL012736-RA	0.42487	19.2583	"ribosomal protein S12, putative [Source:VB External Description;Acc:AAEL012686]"
AAEL012736-RB	0.423377	19.3358	60S ribosomal protein L19 [Source:VB External Description;Acc:AAEL012733]
AAEL012736-RC	0.42228	19.4802	ribosomal protein L15 [Source:VB External Description;Acc:AAEL012736]
AAEL001849-RA	0.421906	102.92	"ribosomal protein L34, putative [Source:VB External Description;Acc:AAEL001849]"
AAEL012736-RE	0.420779	19.5588	ribosomal protein L15 [Source:VB External Description;Acc:AAEL012736]
AAEL003872-RA	0.42029	14.0516	Translationally-controlled tumor protein homolog (TCTP) [Source:VB External Description;Acc:AAEL003872]
AAEL001488-RA	0.419444	18.3966	ribosomal protein L15 [Source:VB External Description;Acc:AAEL001488]
AAEL000823-RA	0.415194	29.4683	"ribosomal protein L35A, putative [Source:VB External Description;Acc:AAEL000823]"
AAEL000823-RB	0.415194	29.4683	"ribosomal protein L35A, putative [Source:VB External Description;Acc:AAEL000823]"
AAEL003396-RA	0.413978	9.7356	60S ribosomal protein L32 [Source:VB External Description;Acc:AAEL003396]
AAEL011656-RA	0.41129	13.1341	"ribosomal protein L27, putative [Source:VB External Description;Acc:AAEL011587]"
AAEL008103-RA	0.408946	16.7466	40S ribosomal protein S8 [Source:VB External Description;Acc:AAEL008103]
AAEL009496-RA	0.407725	12.5326	40S ribosomal protein S7 [Source:VB External Description;Acc:AAEL009496]
AAEL005266-RA	0.405405	12.0617	40S ribosomal protein S14 [Source:VB External Description;Acc:AAEL005266]
AAEL017516-RC	0.404692	37.1692
AAEL002534-RA	0.400438	25.3685	60S ribosomal protein L10 [Source:VB External Description;Acc:AAEL002534]
AAEL007699-RB	0.4	13.6258	60S ribosomal protein L9 [Source:VB External Description;Acc:AAEL007699]
AAEL017516-RA	0.4	38.0968
AAEL017516-RB	0.398268	38.8299
AAEL005266-RB	0.395556	12.7548	40S ribosomal protein S14 [Source:VB External Description;Acc:AAEL005266]
AAEL004851-RA	0.394515	26.9902	hypothetical protein [Source:VB External Description;Acc:AAEL004851]
AAEL005722-RA	0.390947	14.0494	60S ribosomal protein L7a [Source:VB External Description;Acc:AAEL005722]
AAEL007699-RD	0.389764	14.7596	60S ribosomal protein L9 [Source:VB External Description;Acc:AAEL007699]
AAEL008188-RA	0.38758	27.3902	60S ribosomal protein L6 [Source:VB External Description;Acc:AAEL008188]
AAEL005766-RB	0.386167	20.4746	fructose-bisphosphate aldolase [Source:VB External Description;Acc:AAEL005766]
AAEL010787-RB	0.385093	9.54312	DEAD box ATP-dependent RNA helicase [Source:VB External Description;Acc:AAEL010787]
AAEL013625-RA	0.383178	12.788	60S ribosomal protein L23 (L17A)(AeRpL17A) [Source:VB External Description;Acc:AAEL013583]
AAEL013625-RB	0.383178	12.788	"acidic ribosomal protein P1, putative [Source:VB External Description;Acc:AAEL013587]"
AAEL013625-RC	0.383178	12.788	40S ribosomal protein S5 [Source:VB External Description;Acc:AAEL013625]
AAEL013625-RD	0.383178	12.788	40S ribosomal protein S5 [Source:VB External Description;Acc:AAEL013625]
AAEL007699-RA	0.382812	15.3215	60S ribosomal protein L9 [Source:VB External Description;Acc:AAEL007699]
AAEL007699-RC	0.382812	15.3215	60S ribosomal protein L9 [Source:VB External Description;Acc:AAEL007699]
AAEL009403-RA	0.381579	9.1447	hypothetical protein [Source:VB External Description;Acc:AAEL009403]
AAEL004175-RA	0.380952	30.4023	40S ribosomal protein S17 [Source:VB External Description;Acc:AAEL004175]
AAEL012733-RA	0.379747	19.159	low-density lipoprotein receptor (ldl) [Source:VB External Description;Acc:AAEL012251]
AAEL013097-RA	0.377976	20.5242	conserved hypothetical protein [Source:VB External Description;Acc:AAEL013027]
AAEL017198-RA	0.377049	11.2221
AAEL013583-RA	0.375367	21.0595	conserved hypothetical protein [Source:VB External Description;Acc:AAEL013533]
AAEL015006-RA	0.375	20.7827	60S ribosomal protein L27e [Source:VB External Description;Acc:AAEL014838]
AAEL005629-RA	0.373057	12.0354	"ribosomal protein L35, putative [Source:VB External Description;Acc:AAEL005629]"
AAEL013359-RB	0.370558	12.414	"lethal(2)essential for life protein, l2efl [Source:VB External Description;Acc:AAEL013348]"
AAEL010787-RA	0.366337	12.9554	40S ribosomal protein S19 [Source:VB External Description;Acc:AAEL010756]
AAEL010787-RD	0.366337	12.9554	DEAD box ATP-dependent RNA helicase [Source:VB External Description;Acc:AAEL010787]
AAEL012686-RA	0.365957	30.1913	cathepsin b [Source:VB External Description;Acc:AAEL012216]
AAEL011447-RA	0.364764	26.0163	"high mobility group non-histone protein, putative [Source:VB External Description;Acc:AAEL011414]"
AAEL013536-RA	0.364629	29.5836	DEAD box ATP-dependent RNA helicase [Source:VB External Description;Acc:AAEL013359]
AAEL013359-RA	0.364583	12.4042	"lethal(2)essential for life protein, l2efl [Source:VB External Description;Acc:AAEL013338]"
AAEL000010-RB	0.363946	19.0443	"ribosomal protein L36, putative [Source:VB External Description;Acc:AAEL000010]"
AAEL000010-RA	0.360544	19.3151	"ribosomal protein L36, putative [Source:VB External Description;Acc:AAEL000010]"
AAEL013359-RC	0.359375	12.6752	DEAD box ATP-dependent RNA helicase [Source:VB External Description;Acc:AAEL013359]
AAEL002639-RA	0.358362	19.4241	"ribosomal protein L36, putative [Source:VB External Description;Acc:AAEL002639]"
AAEL013272-RA	0.357542	11.9069	60S ribosomal protein L10a [Source:VB External Description;Acc:AAEL013221]
AAEL014583-RC	0.356902	19.8084	60S acidic ribosomal protein P2 [Source:VB External Description;Acc:AAEL014583]
AAEL007771-RB	0.35689	18.8756	60S ribosomal protein L22 [Source:VB External Description;Acc:AAEL007771]
AAEL007771-RA	0.353571	18.9329	60S ribosomal protein L22 [Source:VB External Description;Acc:AAEL007771]
AAEL008481-RB	0.35248	26.014	60S ribosomal protein L18 [Source:VB External Description;Acc:AAEL008481]
AAEL008481-RA	0.351706	25.9607	60S ribosomal protein L18 [Source:VB External Description;Acc:AAEL008481]
AAEL006860-RA	0.351351	10.0992	"ribosomal protein S28, putative [Source:VB External Description;Acc:AAEL006860]"
AAEL013021-RA	0.350282	12.1313	60S ribosomal protein L11 [Source:VB External Description;Acc:AAEL012944]
AAEL005817-RA	0.347953	23.6652	60S ribosomal protein L26 [Source:VB External Description;Acc:AAEL005817]
AAEL014583-RA	0.346801	20.6485	conserved hypothetical protein [Source:VB External Description;Acc:AAEL014561]
AAEL009747-RA	0.343662	24.9998	40S ribosomal protein S30 [Source:VB External Description;Acc:AAEL009653]
AAEL003942-RA	0.343182	31.0465	"60S ribosomal protein L44 L41, putative [Source:VB External Description;Acc:AAEL003942]"
AAEL014583-RB	0.340136	21.004	60S ribosomal protein L12 [Source:VB External Description;Acc:AAEL014562]
AAEL007715-RA	0.339506	11.6033	60S ribosomal protein L21 [Source:VB External Description;Acc:AAEL007715]
AAEL007715-RB	0.339506	11.6033	60S ribosomal protein L21 [Source:VB External Description;Acc:AAEL007715]
AAEL003582-RA	0.339367	15.8382	ribosomal protein S15p/S13e [Source:VB External Description;Acc:AAEL003582]
AAEL002372-RC	0.337349	23.9892	40S ribosomal protein S11 [Source:VB External Description;Acc:AAEL002372]
AAEL008353-RA	0.336207	25.2623	"ribosomal protein L28, putative [Source:VB External Description;Acc:AAEL008353]"
AAEL002372-RB	0.334337	24.2843	40S ribosomal protein S11 [Source:VB External Description;Acc:AAEL002372]
AAEL009994-RA	0.334232	27.1486	conserved hypothetical protein [Source:VB External Description;Acc:AAEL009955]
AAEL000032-RA	0.333817	50.5036	40S ribosomal protein S6 [Source:VB External Description;Acc:AAEL000032]
AAEL008329-RA	0.333333	11.8979	60S ribosomal protein L24 [Source:VB External Description;Acc:AAEL008329]
AAEL008353-RB	0.332386	25.9515	"ribosomal protein L28, putative [Source:VB External Description;Acc:AAEL008353]"
AAEL009653-RA	0.332016	18.6806	cathepsin b [Source:VB External Description;Acc:AAEL009637]
AAEL000032-RC	0.331903	51.6354	40S ribosomal protein S6 [Source:VB External Description;Acc:AAEL000032]
AAEL010884-RA	0.331754	15.596	DEAD box ATP-dependent RNA helicase [Source:VB External Description;Acc:AAEL010787]
AAEL004855-RA	0.331476	26.5652	"ADP,ATP carrier protein [Source:VB External Description;Acc:AAEL004855]"
AAEL005129-RA	0.330645	18.4133	40S ribosomal protein S30 [Source:VB External Description;Acc:AAEL005129]
AAEL003427-RA	0.32963	20.1291	40S ribosomal protein S16 [Source:VB External Description;Acc:AAEL003427]
AAEL006785-RA	0.329268	12.2444	60S ribosomal protein L18a [Source:VB External Description;Acc:AAEL006785]
AAEL006785-RB	0.329193	12.0241	60S ribosomal protein L18a [Source:VB External Description;Acc:AAEL006785]
AAEL012944-RB	0.328431	30.5649	hypothetical protein [Source:VB External Description;Acc:AAEL012928]
AAEL000032-RB	0.327062	52.0523	40S ribosomal protein S6 [Source:VB External Description;Acc:AAEL000032]
AAEL009653-RB	0.326772	19.156	40S ribosomal protein S30 [Source:VB External Description;Acc:AAEL009653]
AAEL013221-RC	0.325908	156.279	60S ribosomal protein L10a [Source:VB External Description;Acc:AAEL013221]
AAEL013221-RA	0.324915	156.45	60S ribosomal protein L23 (L17A)(AeRpL17A) [Source:VB External Description;Acc:AAEL013097]
AAEL013221-RB	0.3246	156.801	40S ribosomal protein S3a [Source:VB External Description;Acc:AAEL013158]
AAEL007168-RA	0.323944	21.6638	conserved hypothetical protein [Source:VB External Description;Acc:AAEL007168]
AAEL002687-RA	0.323232	15.1469	"sterol carrier protein-2, putative [Source:VB External Description;Acc:AAEL002687]"
AAEL005451-RA	0.309091	13.3572	60S ribosomal protein L38 [Source:VB External Description;Acc:AAEL005451]
AAEL010821-RA	0.307692	11.6409	DEAD box ATP-dependent RNA helicase [Source:VB External Description;Acc:AAEL010787]
AAEL012944-RA	0.30581	26.8192	ribosomal protein L15 [Source:VB External Description;Acc:AAEL012736]
AAEL013680-RA	0.304878	27.0011	40S ribosomal protein S5 [Source:VB External Description;Acc:AAEL013625]
AAEL003203-RA	0.303621	29.7008	"fatty acid desaturase, putative [Source:VB External Description;Acc:AAEL003203]"
AAEL002368-RA	0.302752	18.0979	conserved hypothetical protein [Source:VB External Description;Acc:AAEL002368]
AAEL009151-RA	0.298755	20.3266	40S ribosomal protein S8 [Source:VB External Description;Acc:AAEL009151]
AAEL011471-RD	0.298507	62.2215	60S ribosomal protein L17 [Source:VB External Description;Acc:AAEL011471]
AAEL011471-RA	0.298365	62.0031	"high mobility group non-histone protein, putative [Source:VB External Description;Acc:AAEL011414]"
AAEL014562-RA	0.298137	13.6124	40S ribosomal protein S24 [Source:VB External Description;Acc:AAEL014292]
AAEL009151-RB	0.297521	20.5108	40S ribosomal protein S8 [Source:VB External Description;Acc:AAEL009151]
AAEL011471-RB	0.294993	63.2628	60S ribosomal protein L14 [Source:VB External Description;Acc:AAEL011447]
AAEL011219-RA	0.29434	22.7442	60S acidic ribosomal protein P0 [Source:VB External Description;Acc:AAEL010821]
AAEL011471-RC	0.294197	63.6336	60S ribosomal protein L17 [Source:VB External Description;Acc:AAEL011471]
AAEL003203-RB	0.293827	34.8303	"fatty acid desaturase, putative [Source:VB External Description;Acc:AAEL003203]"
AAEL010573-RB	0.293375	27.3109	"ribosomal protein S25, putative [Source:VB External Description;Acc:AAEL010573]"
AAEL000068-RB	0.291139	27.4657	"ribosomal protein S25, putative [Source:VB External Description;Acc:AAEL000068]"
AAEL010299-RA	0.289116	25.7579	conserved hypothetical protein [Source:VB External Description;Acc:AAEL010169]
AAEL010573-RA	0.28882	28.2439	serine-pyruvate aminotransferase [Source:VB External Description;Acc:AAEL010480]
AAEL009825-RA	0.28839	23.4593	40S ribosomal protein S18 [Source:VB External Description;Acc:AAEL009747]
AAEL005027-RA	0.288136	46.7016	"acidic ribosomal protein P1, putative [Source:VB External Description;Acc:AAEL005027]"
AAEL010756-RB	0.2875	21.1609	40S ribosomal protein S19 [Source:VB External Description;Acc:AAEL010756]
AAEL005097-RA	0.286567	29.6455	"cold induced protein (BnC24A), putative [Source:VB External Description;Acc:AAEL005097]"
AAEL010756-RA	0.286307	21.3489	"OCP-II protein, putative [Source:VB External Description;Acc:AAEL010692]"
AAEL010299-RB	0.283784	26.4821	40S ribosomal protein S12 [Source:VB External Description;Acc:AAEL010299]
AAEL001547-RA	0.282158	21.6993	hypothetical protein [Source:VB External Description;Acc:AAEL001547]
AAEL003530-RA	0.281768	48.9658	"acidic ribosomal protein P1, putative [Source:VB External Description;Acc:AAEL003530]"
AAEL000068-RA	0.280488	29.7266	"ribosomal protein S25, putative [Source:VB External Description;Acc:AAEL000068]"
AAEL006256-RA	0.275641	14.4088	"ATPase subunit, putative [Source:VB External Description;Acc:AAEL006256]"
AAEL005085-RA	0.27027	27.9188	60S ribosomal protein L30 [Source:VB External Description;Acc:AAEL005085]
AAEL005220-RA	0.27027	27.9188	60S ribosomal protein L30 [Source:VB External Description;Acc:AAEL005220]
AAEL003606-RA	0.269565	10.8767	"purine biosynthesis protein 6, pur6 [Source:VB External Description;Acc:AAEL003606]"
AAEL013069-RA	0.267303	39.9796	hypothetical protein [Source:VB External Description;Acc:AAEL013021]
AAEL014292-RA	0.266376	21.9294	40S ribosomal protein SA [Source:VB External Description;Acc:AAEL013694]
AAEL014903-RA	0.266376	21.9294	serine-pyruvate aminotransferase [Source:VB External Description;Acc:AAEL014817]
AAEL003324-RA	0.265487	43.4341	"acidic ribosomal protein P1, putative [Source:VB External Description;Acc:AAEL003324]"
AAEL005220-RB	0.265101	28.6788	60S ribosomal protein L30 [Source:VB External Description;Acc:AAEL005220]
AAEL013533-RA	0.264706	9.83131	DEAD box ATP-dependent RNA helicase [Source:VB External Description;Acc:AAEL013359]
AAEL011587-RB	0.264	12.0813	60S ribosomal protein L17 [Source:VB External Description;Acc:AAEL011471]
AAEL010168-RB	0.263492	30.505	40S ribosomal protein S2 [Source:VB External Description;Acc:AAEL010168]
AAEL002510-RA	0.262517	71.8373	serine hydroxymethyltransferase [Source:VB External Description;Acc:AAEL002510]
AAEL002510-RB	0.262517	71.8373	serine hydroxymethyltransferase [Source:VB External Description;Acc:AAEL002510]
AAEL009830-RA	0.262162	36.0168	60S ribosomal protein L13a [Source:VB External Description;Acc:AAEL009825]
AAEL010168-RA	0.261981	30.4897	conserved hypothetical protein [Source:VB External Description;Acc:AAEL010097]
AAEL014838-RA	0.255061	24.715	"acidic ribosomal protein P1, putative [Source:VB External Description;Acc:AAEL014764]"
AAEL011587-RA	0.251012	25.1052	60S ribosomal protein L17 [Source:VB External Description;Acc:AAEL011471]
AAEL010169-RA	0.248	12.8539	40S ribosomal protein S2 [Source:VB External Description;Acc:AAEL010168]
AAEL007444-RA	0.230769	25.7142	conserved hypothetical protein [Source:VB External Description;Acc:AAEL007444]
AAEL007444-RB	0.230769	25.7142	conserved hypothetical protein [Source:VB External Description;Acc:AAEL007444]
AAEL002047-RA	0.230216	15.3072	40S ribosomal protein S10 [Source:VB External Description;Acc:AAEL002047]
AAEL002372-RA	0.227907	23.8876	40S ribosomal protein S11 [Source:VB External Description;Acc:AAEL002372]
AAEL009472-RA	0.216216	21.4978	hypothetical protein [Source:VB External Description;Acc:AAEL009472]
AAEL014764-RA	0.210811	21.9479	60S acidic ribosomal protein P2 [Source:VB External Description;Acc:AAEL014583]
AAEL013587-RA	0.210744	28.7176	ubiquitin (ribosomal protein L40) [Source:VB External Description;Acc:AAEL013536]
AAEL000449-RA	0.205021	28.9903	"acidic ribosomal protein P1, putative [Source:VB External Description;Acc:AAEL000449]"
AAEL008946-RA	0.2	29.6769	"acidic ribosomal protein P1, putative [Source:VB External Description;Acc:AAEL008946]"
AAEL004178-RA	0.132743	36.217	"ribose-phosphate pyrophosphokinase 1, [Source:VB External Description;Acc:AAEL004178]"
AAEL004178-RB	0.132159	36.4606	"ribose-phosphate pyrophosphokinase 1, [Source:VB External Description;Acc:AAEL004178]"
AAEL009859-RA	0.122807	9.49763	"acidic ribosomal protein P1, putative [Source:VB External Description;Acc:AAEL009830]"
AAEL008083-RA	0.117647	26.0185	40S ribosomal protein SA [Source:VB External Description;Acc:AAEL008083]
AAEL013694-RA	0.117647	26.0185	40S ribosomal protein S5 [Source:VB External Description;Acc:AAEL013625]
AAEL017465-RA	0.0681818	9.16089	Vitelline membrane protein 15a-2 Precursor [Contains Trypsin-modulating oostatic factor(TMOF)(OOSH)] [Source:VB External Description;Acc:AAEL017403]
AAEL010640-RA	0.0612245	10.5128	"ribosomal protein S25, putative [Source:VB External Description;Acc:AAEL010573]"
AAEL014817-RA	0.0549451	20.0701	60S acidic ribosomal protein P2 [Source:VB External Description;Acc:AAEL014583]
AAEL010480-RA	0.0531915	20.8942	Vitellogenin-A1 Precursor (VG)(PVG1) [Contains Vitellin light chain(VL);Vitellin heavy chain(VH)] [Source:VB External Description;Acc:AAEL010434]
AAEL002675-RA	0.0196078	13.334	arginase [Source:VB External Description;Acc:AAEL002675]
